# Supplementary material for: Exploring the burden of paediatric acute otitis media with discharge in the UK: a qualitative study
Source: PubMed Central journal article supplement (PMC11499759; doi:10.1136/bmjpo-2024-003012), 2024-10-21
Supplement: bmjpo-2024-003012.reviewer_comments.pdf [file bmjpo-2024-003012.reviewer_comments.pdf]

## PEER REVIEW HISTORY

BMJ Paediatrics Open publishes all reviews undertaken for accepted manuscripts. Reviewers are asked to complete a checklist review form and are provided with free text boxes to elaborate on their assessment. These free text comments are reproduced below.

### ARTICLE DETAILS

|                            |                                                                                                                                                        |
|----------------------------|--------------------------------------------------------------------------------------------------------------------------------------------------------|
| <b>TITLE (PROVISIONAL)</b> | Exploring the burden of paediatric acute otitis media with discharge in the UK: a qualitative study                                                    |
| <b>AUTHORS</b>             | Heward, Elliot; Lunn, Judith; Birkenshaw-Dempsey, James; Molloy, John; Isba, Rachel; Ashcroft, Darren M; Hay, Alastair; Nichani, Jaya R; Bruce, Iain A |

### VERSION 1 - REVIEW

|                                      |                                  |
|--------------------------------------|----------------------------------|
| <b>REVIEWER NAME</b>                 | <i>John Roche</i>                |
| <b>REVIEWER AFFILIATION</b>          | Bolton NHS Foundation Trust, ENT |
| <b>REVIEWER CONFLICT OF INTEREST</b> |                                  |
| <b>DATE REVIEW RETURNED</b>          | 03-Sep-2024                      |

|                         |                                                                                                                                                                                                                                                                                                  |
|-------------------------|--------------------------------------------------------------------------------------------------------------------------------------------------------------------------------------------------------------------------------------------------------------------------------------------------|
| <b>GENERAL COMMENTS</b> | This study provides a fantastic foundation for future research. The study presents patient, parent and clinical evaluations relating to their experiences concisely. There is a clear need for this type of research in our speciality and this study addresses this gap in knowledge very well. |
|-------------------------|--------------------------------------------------------------------------------------------------------------------------------------------------------------------------------------------------------------------------------------------------------------------------------------------------|
